# Supplementary material for: CD138 expression is a molecular signature but not a developmental requirement for RORγt+ NKT17 cells
Source: JCI journal article supplement (doi:10.1172/jci.insight.148038), 2021-09-21
Supplement: sd1 [file 1]

# Supplementary Figure 1

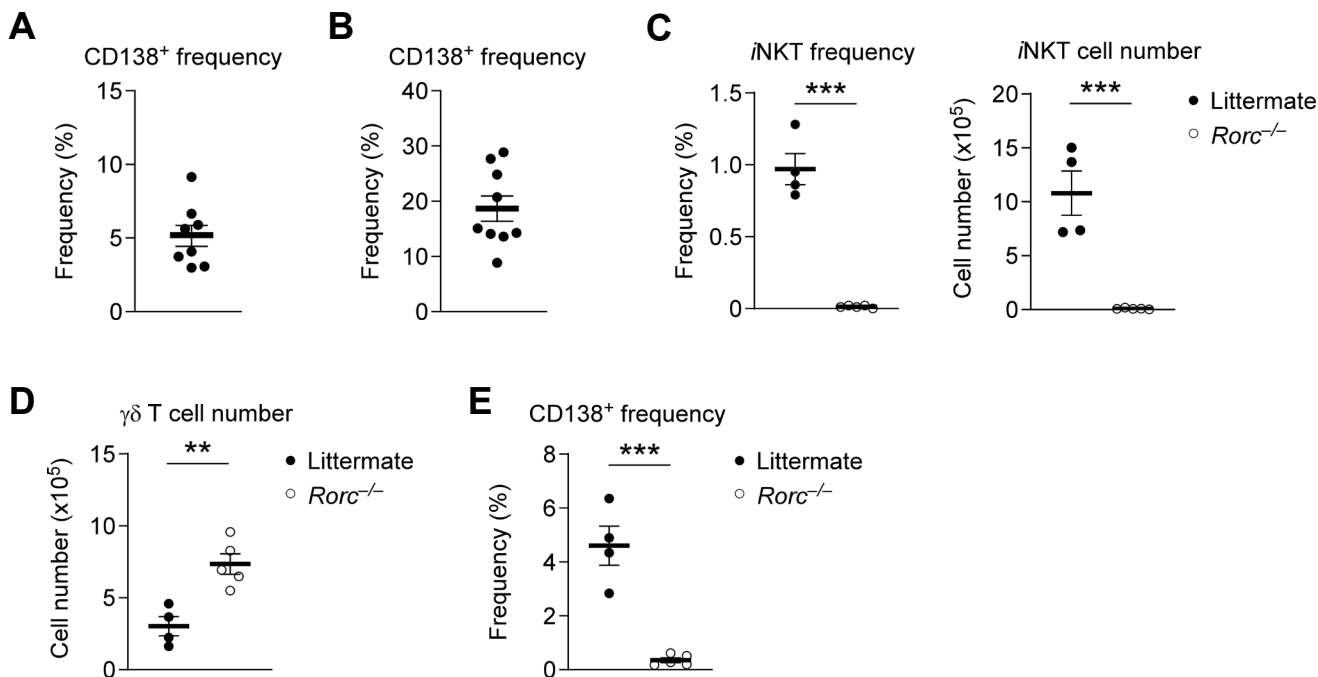

## Supplementary Figure 1. CD138 expression in BALB/c thymocytes

(A) The graph shows the frequency of CD138<sup>+</sup>  $\gamma\delta$  T cells among total thymic  $\gamma\delta$  T cells of BALB/c mice. Data are summary of 3 independent experiments with a total of 8 BALB/c mice.

(B) The graph shows the frequencies of CD138<sup>+</sup> iNKT cells among total thymic iNKT cells of BALB/c mice. Data are summary of 4 independent experiments with a total of 9 BALB/c mice.

(C) The graphs show frequencies and cell numbers of iNKT cells in *Rorc*<sup>-/-</sup> and WT littermate BALB/c thymocytes. Results are the summary of 3 independent experiments with a total of 5 *Rorc*<sup>-/-</sup> and 4 WT littermate mice.

(D) Thymic  $\gamma\delta$  T cell numbers in *Rorc*<sup>-/-</sup> and WT littermate BALB/c mice. Results are summary of 3 independent experiments with a total of 5 *Rorc*<sup>-/-</sup> and 4 WT littermate mice.

(E) The graph shows the frequency of CD138<sup>+</sup>  $\gamma\delta$  T cells among total thymic  $\gamma\delta$  T cells of *Rorc*<sup>-/-</sup> and WT littermate BALB/c mice. Results are summary of 3 independent experiments with a total of 5 *Rorc*<sup>-/-</sup> and 4 WT littermate mice.

# Supplementary Figure 2

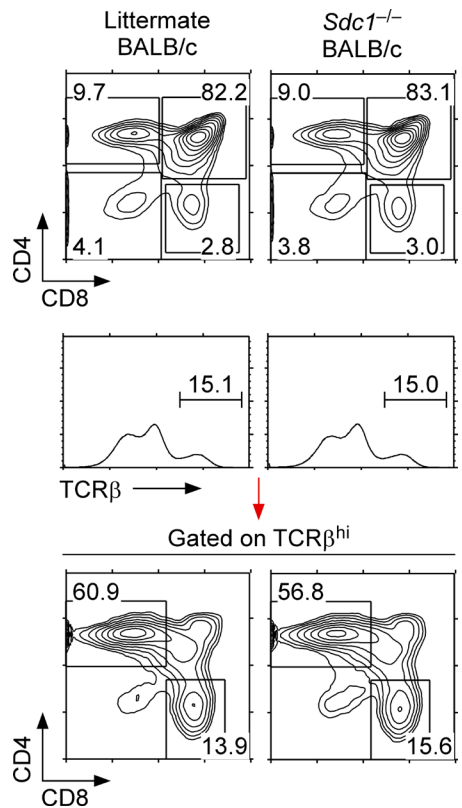

## Supplementary Figure 2. T cell development in *Sdc1*<sup>-/-</sup> BALB/c mice

Contour plots show CD8 versus CD4 profiles of total (top) and TCRβ<sup>hi</sup>-gated (bottom) *Sdc1*<sup>-/-</sup> and WT littermate BALB/c thymocytes. The results are representative of 6 independent experiments with a total of 10 *Sdc1*<sup>-/-</sup> and 10 WT littermate BALB/c mice.

# Supplementary Figure 3

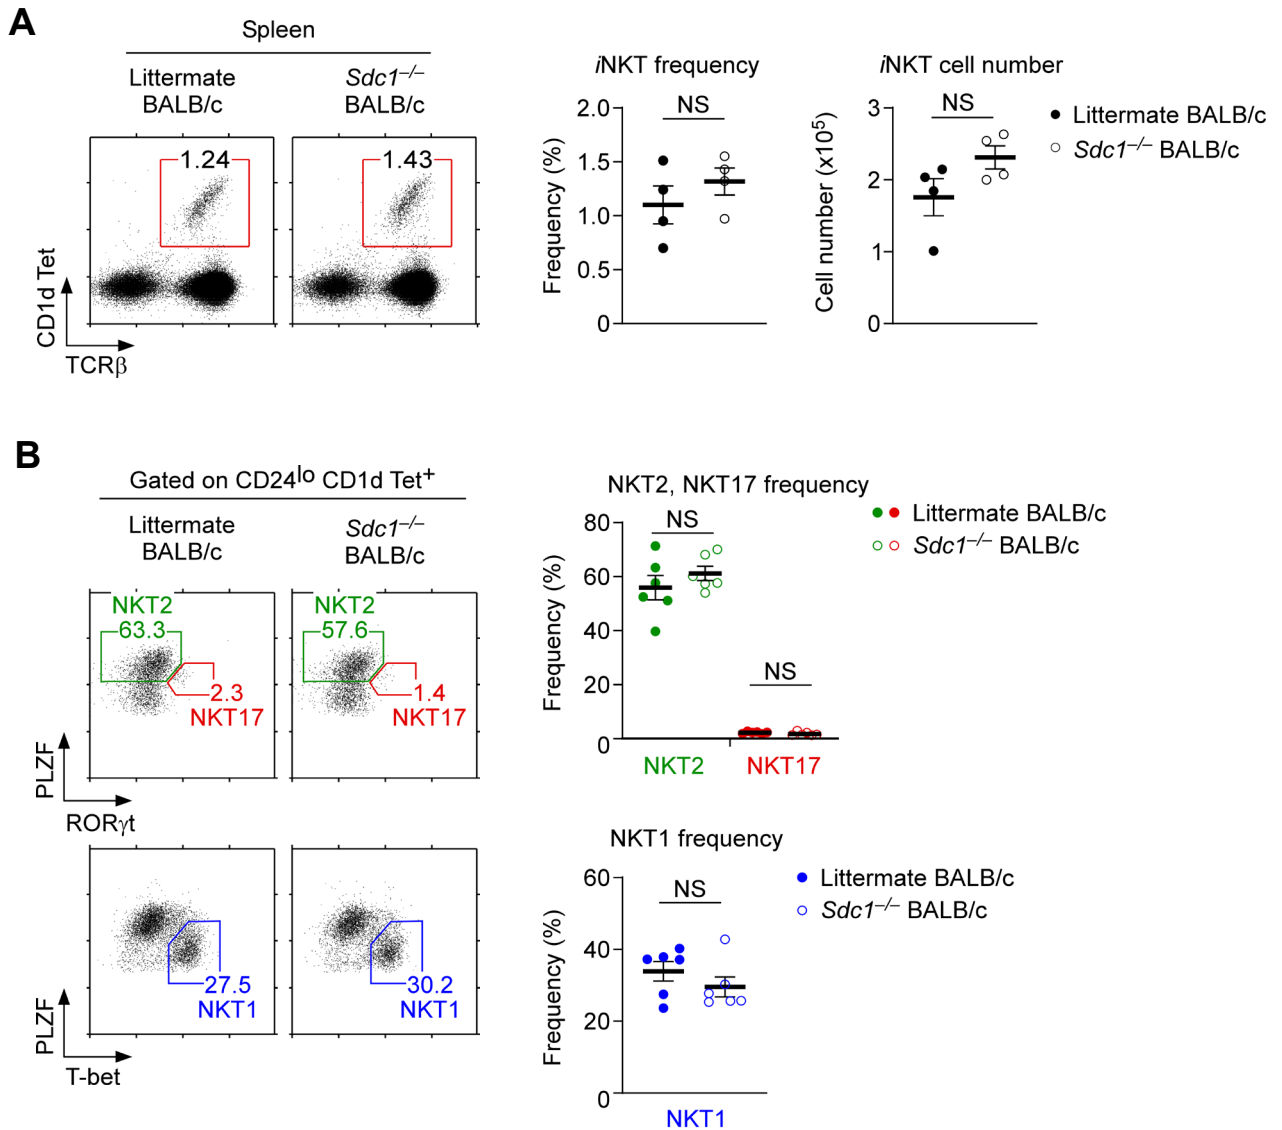

## Supplementary Figure 3. Splenic *i*NKT cells in *Sdc1*<sup>-/-</sup> BALB/c mice

(A) Identification of *i*NKT cells among B cell-depleted splenocytes of *Sdc1*<sup>-/-</sup> and WT littermate BALB/c mice. The dot plots are representative (left), and the *i*NKT frequency and number graphs (right) show the summary of 2 independent experiments with a total of 4 *Sdc1*<sup>-/-</sup> and 4 WT littermate BALB/c mice. Numbers in the box show frequencies of *i*NKT cells among B cell-depleted splenocytes.

(B) Subset distribution in *Sdc1*<sup>-/-</sup> and WT littermate BALB/c splenic *i*NKT cells. The frequencies of NKT1, NKT2, and NKT17 cells were determined by T-bet versus PLZF and ROR $\gamma$ t versus PLZF expression. The dot plots are representative (left), and the graphs show the summary (right) of 3 independent experiments with a total of 6 *Sdc1*<sup>-/-</sup> and 6 WT littermate BALB/c mice.

# Supplementary Figure 4

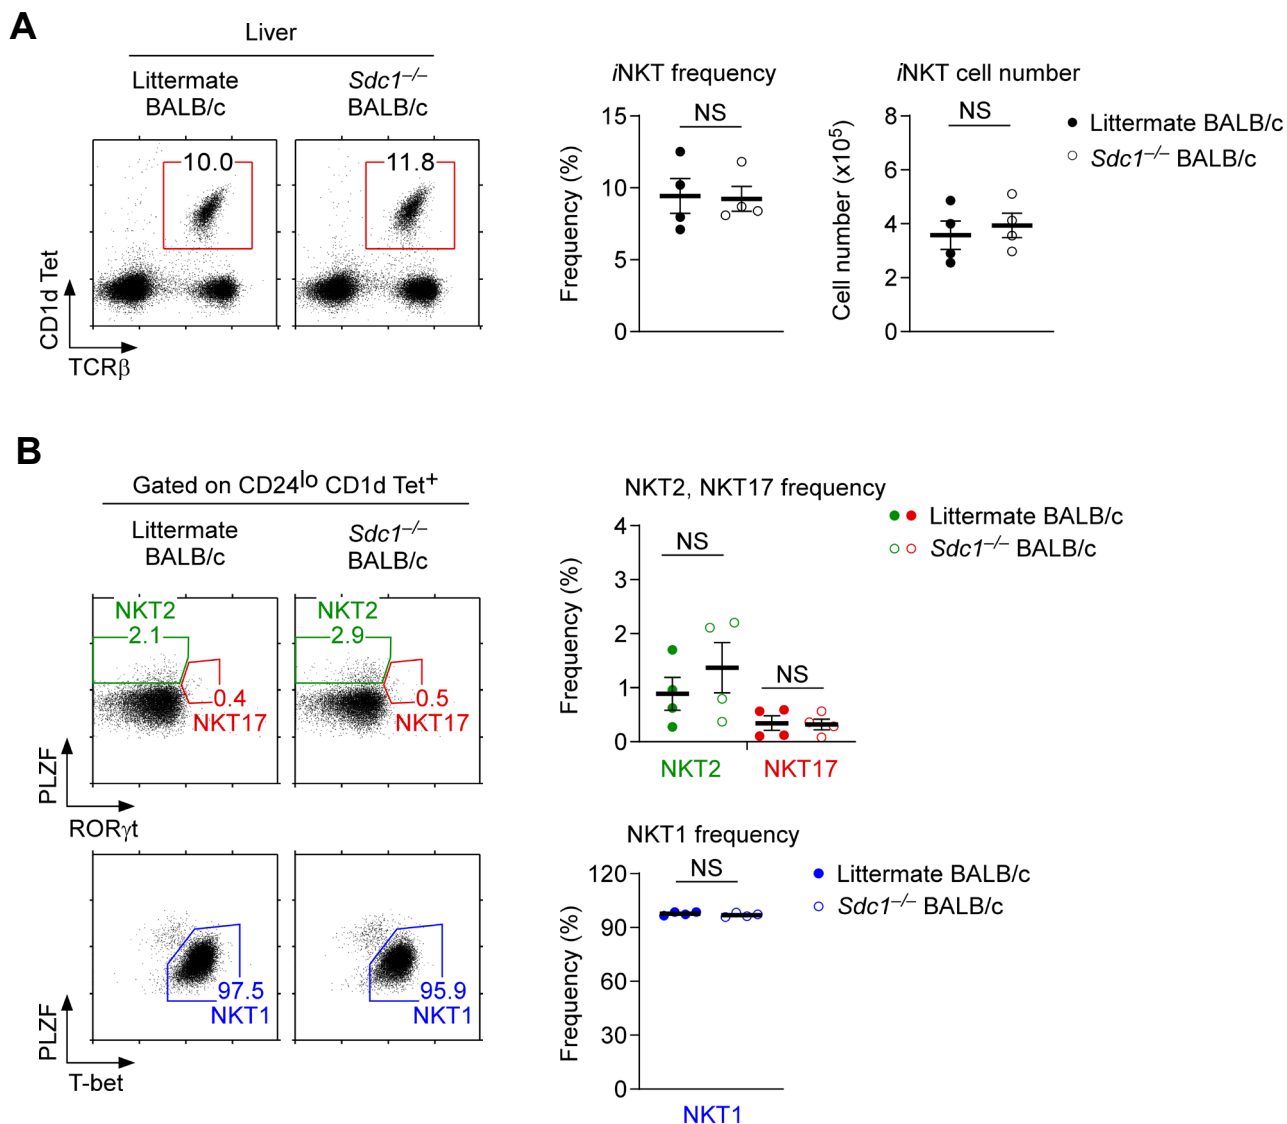

## Supplementary Figure 4. Liver *i*NKT cells in *Sdc1*<sup>-/-</sup> BALB/c mice

(A) Identification of *i*NKT cells in the liver of *Sdc1*<sup>-/-</sup> and WT littermate BALB/c mice. The dot plots are representative (left), and the *i*NKT frequency and number graphs (right) show the summary of 2 independent experiments with a total of 4 *Sdc1*<sup>-/-</sup> and 4 WT littermate BALB/c mice. Numbers in the box show frequencies of *i*NKT cells among total CD45<sup>+</sup> liver lymphocytes.

(B) *i*NKT subset distribution in *Sdc1*<sup>-/-</sup> and WT littermate BALB/c liver cells. The frequencies of NKT1, NKT2, and NKT17 cells were determined by T-bet versus PLZF and RORγt versus PLZF expression. The dot plots are representative (left), and the graphs show the summary (right) of 2 independent experiments with a total of 4 *Sdc1*<sup>-/-</sup> and 4 WT littermate BALB/c mice.

# Supplementary Figure 5

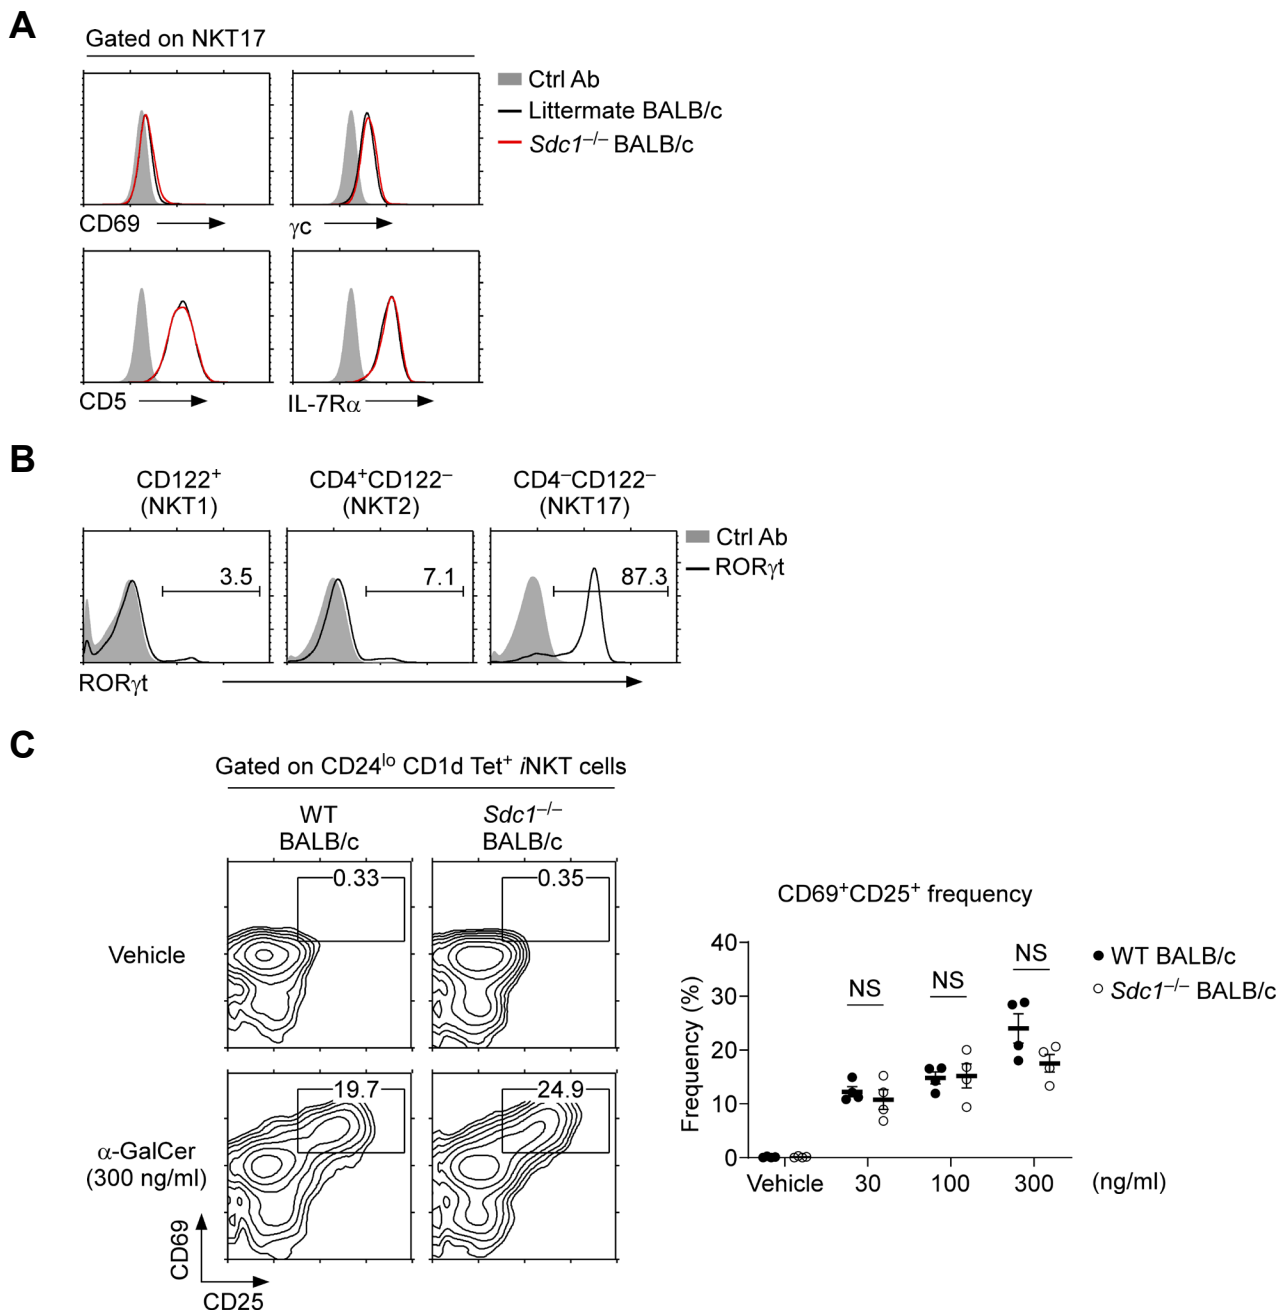

## Supplementary Figure 5. Characterization of thymic *i*NKT subsets in *Sdc1*<sup>-/-</sup> BALB/c mice

(A) CD69, CD5,  $\gamma$ c and IL-7R $\alpha$  expression were assessed on NKT17 cells of *Sdc1*<sup>-/-</sup> and WT littermate BALB/c thymocytes. The histograms are representative of 2 independent experiments with a total of 2 *Sdc1*<sup>-/-</sup> and 2 WT littermate BALB/c mice.

(B) ROR $\gamma$ t expression in thymic *i*NKT subsets as identified by CD122 and CD4 staining. The histograms are representative of 2 independent experiments with a total of 3 BALB/c mice.

(C) Surface CD69 and CD25 expression was assessed on mature *i*NKT cells of *Sdc1*<sup>-/-</sup> and WT littermate BALB/c thymocytes upon overnight *in vitro* stimulation with the indicated amounts of  $\alpha$ -GalCer. Contour plots are representative, and the graph show the summary of 3 independent experiments. Results are summary of 3 independent experiments with a total of 4 *Sdc1*<sup>-/-</sup> and 4 WT BALB/c mice.

# Supplementary Figure 6

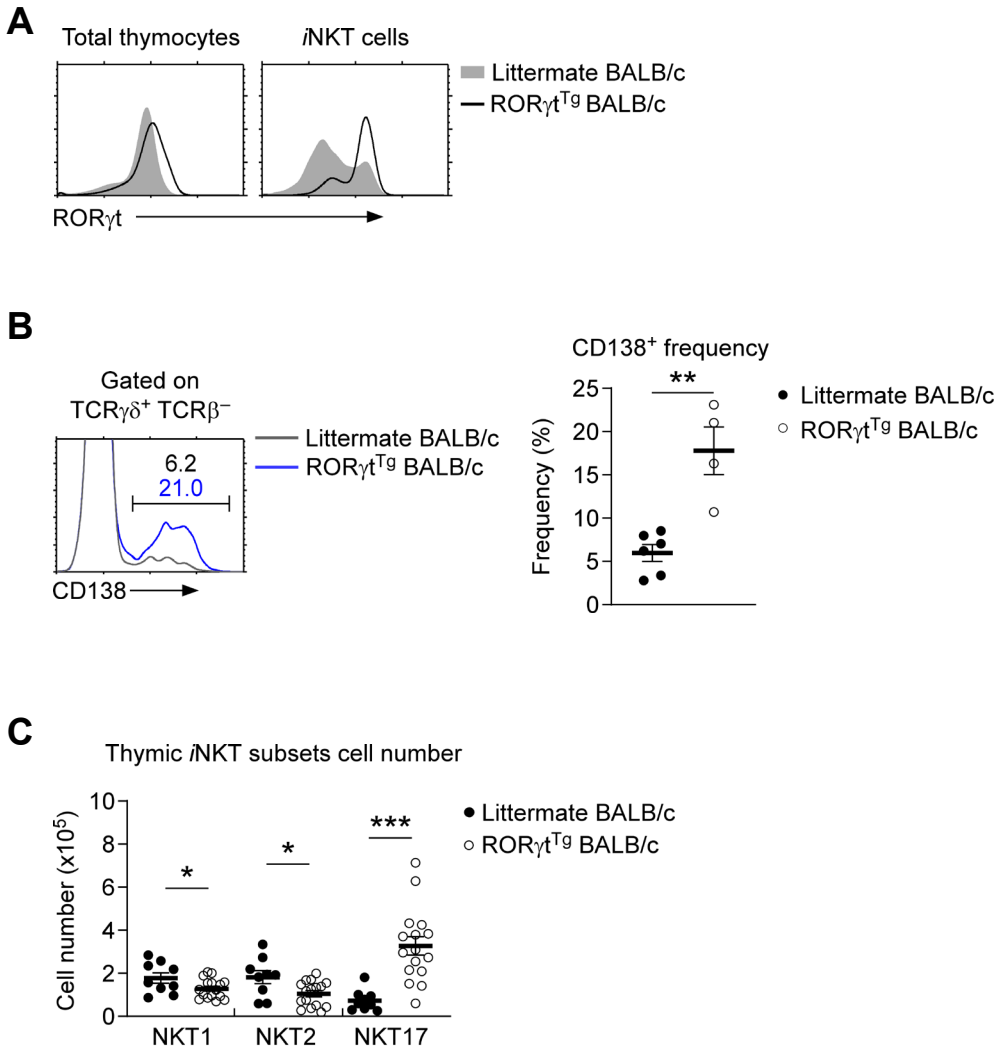

## Supplementary Figure 6. iNKT and $\gamma\delta$ T cell analysis in ROR $\gamma$ t<sup>Tg</sup> BALB/c thymocytes

(A) The intracellular ROR $\gamma$ t contents in total thymocytes and total iNKT cells were assessed in ROR $\gamma$ t<sup>Tg</sup> and WT littermate BALB/c mice. The histograms are representative of 2 independent experiments with a total of 5 ROR $\gamma$ t<sup>Tg</sup> and 3 WT littermate BALB/c mice.

(B) CD138 expression on thymic  $\gamma\delta$  T cells of ROR $\gamma$ t<sup>Tg</sup> BALB/c thymocytes. The histogram (left) identifies CD138<sup>+</sup>  $\gamma\delta$  T cells, and the graph (right) summarizes the frequency of CD138<sup>+</sup>  $\gamma\delta$  T cells. The results are representative of 2 independent experiments with a total of 4 ROR $\gamma$ t<sup>Tg</sup> and 6 littermate WT BALB/c mice.

(C) Thymic NKT1, NKT2 and NKT17 cell numbers were determined in ROR $\gamma$ t<sup>Tg</sup> and WT littermate BALB/c mice. The results show summary of 4 independent experiments with a total of 16 ROR $\gamma$ t<sup>Tg</sup> and 9 WT littermate BALB/c mice.

# Supplementary Figure 7

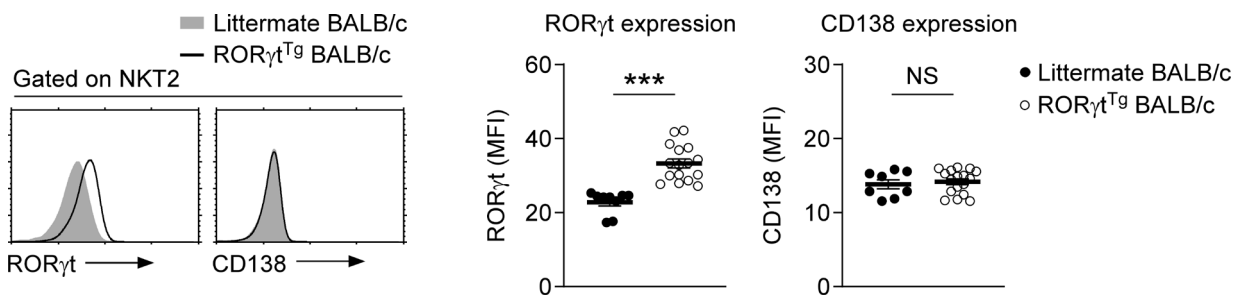

## Supplementary Figure 7. ROR $\gamma$ t and CD138 expression in NKT2 cells of ROR $\gamma$ t<sup>Tg</sup> BALB/c thymocytes

The histograms show ROR $\gamma$ t and CD138 expression in thymic NKT2 cells (left). The graphs show the MFI of ROR $\gamma$ t and CD138 in NKT2 cells of the indicated mice (right). The results show summary of 4 independent experiments with a total of 16 ROR $\gamma$ t<sup>Tg</sup> and 9 WT littermate BALB/c mice.

# Supplementary Figure 8

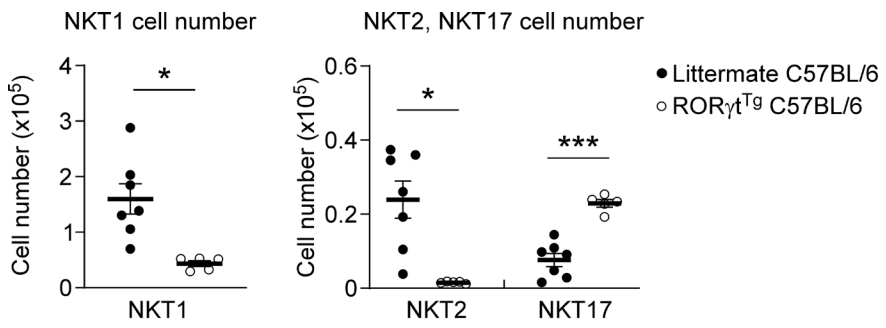

**Supplementary Figure 8. Characterization of thymic *i*NKT subsets in ROR $\gamma$ t<sup>Tg</sup> C57BL/6 mice**  
Thymic NKT1, NKT2 and NKT17 cell numbers were determined in ROR $\gamma$ t<sup>Tg</sup> and WT littermate C57BL/6 mice. The results show summary of 3 independent experiments with a total of 5 ROR $\gamma$ t<sup>Tg</sup> and 7 WT littermate C57BL/6 mice.
